# Supplementary material for: Removal of p-toluenesulfonic acid from wastewater using a filtration-enhanced electro-Fenton reactor
Source: Royal Society of Chemistry journal article supplement (doi:10.1039/d2ra04921j), 2022-01-01
Supplement: d2ra04921j1.pdf [file d2ra04921j1.pdf]

## Supporting information

### **Removal of *p*-toluenesulfonic acid from wastewater using a filtration-enhanced electro-Fenton reactor**

*Xueye Wang*<sup>1</sup>, *Lehui Ren*<sup>1</sup>, *Wengui Zha*, *Zhouyan Li*, *Ruobin Dai*<sup>\*</sup>, *Zhiwei Wang*<sup>\*</sup>

State Key Laboratory of Pollution Control and Resource Reuse, Advanced Membrane Technology Center of Tongji University, Shanghai Institute of Pollution Control and Ecological Security, School of Environmental Science and Engineering, Tongji University, Shanghai 200092, PR China

<sup>1</sup> These authors contributed equally to the work.

*\* Corresponding Author.*

E-mail address: [dairuobin@tongji.edu.cn](mailto:dairuobin@tongji.edu.cn) (R. Dai), [zwwang@tongji.edu.cn](mailto:zwwang@tongji.edu.cn) (Z. Wang).

**Text S1. Analysis of PTSA.** The concentration of PTSA was analyzed using reversed-phase HPLC (Agilent 1290, USA) with a C18 column (ZORBAX Eclipse Plus, 250 mm × 4.6 μm, 5 μm). A 50:50 v/v methanol-phosphate buffer (pH 2.9) was used as the mobile phase. The constant flow rate was set at 1.0 mL/min. An Agilent 1200 photodiode array detector (DAD) at 221 nm was used to detect PTSA, with the injection volume of 50 μL and test temperature of 40°C.

To identify the degradation intermediates of PTSA, the samples were purified using solid-phase extraction (SPE) column to remove salinity prior to the measurement by a liquid chromatograph mass spectrometer (LC-MS) (Waters, Thermo, Q-Exactive) equipped with ACQUITY UPLC HSS T3 column (2.1 mm × 100 mm, 1.8 μm). A 0.05% formic-acetonitrile mixture was used as the mobile phase at the flow rate of 0.3 mL/min. The electrospray ionization mass spectrometry was performed at positive and negative modes with a spray voltage of 3.0 kV and 3.2 kV, respectively. The heater temperature was set at 300°C, ions with  $m/z$  20–200 that cover each frequently-detected PTSA intermediates was monitored.

## Figures

**Fig. S1.** The LSV curve of graphite plate anode and stainless-steel mesh cathode.

**Fig. S2.** The concentration of H<sub>2</sub>O<sub>2</sub> in the effluent of the FEEF system under the experimental conditions of [PTSA]<sub>0</sub> = 100 mg/L, voltage = 2.5 V, pH = 3.0, 0.2 mM Fe<sup>2+</sup> and 1.0 mM H<sub>2</sub>O<sub>2</sub> dosage.

**Fig. S3.** The total ion chromatograms (TIC) for the PTSA effluent of FEEF system at 120 min (a) at positive mode, and (b) negative mode.

**Fig. S4.** LC-MS spectra for the PTSA intermediate products in the effluent of FEEF system at positive mode.

**Fig. S5.** LC-MS spectra for the PTSA intermediate products in the effluent of FEEF system at negative mode.

**Fig. S6.** The removal efficiency of COD in MCEF system under the experimental conditions of  $[\text{PTSA}]_0 = 100 \text{ mg/L}$ , voltage = 2.5 V, pH = 3.0, 0.2 mM  $\text{Fe}^{2+}$  and 1.0 mM  $\text{H}_2\text{O}_2$  dosage.

## **Tables**

**Table S1.** Treatment cost of pre-unit PTSA removal in three systems

**Table S2** Comparison of PTSA removal efficiency with other system literature results.

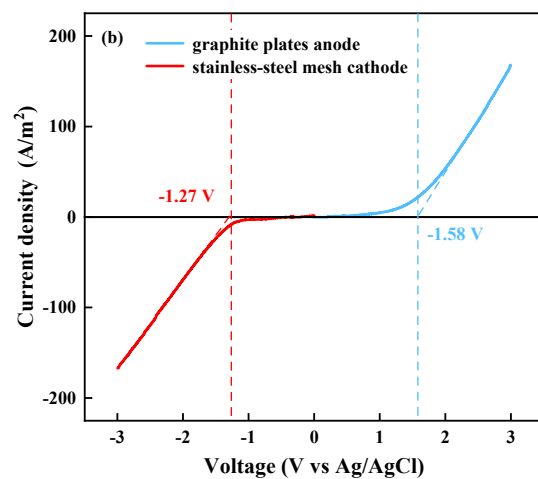

**Fig. S1.** The LSV curve of graphite plate anode and stainless-steel mesh cathode.

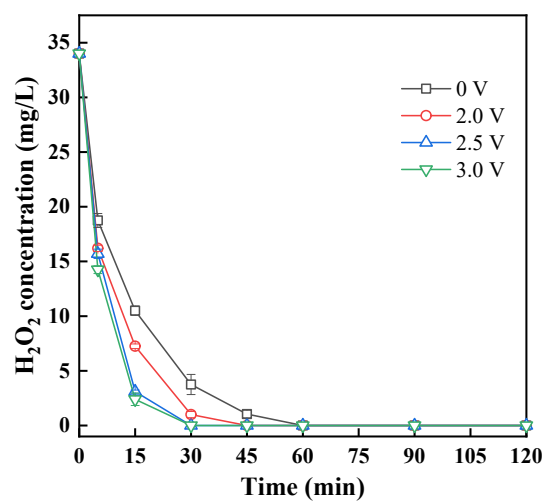

**Fig. S2.** The concentration of H<sub>2</sub>O<sub>2</sub> in the effluent of the FEEF system under the experimental conditions of [PTSA]<sub>0</sub> = 100 mg/L, voltage = 2.5 V, pH = 3.0, 0.2 mM Fe<sup>2+</sup> and 1.0 mM H<sub>2</sub>O<sub>2</sub> dosage.

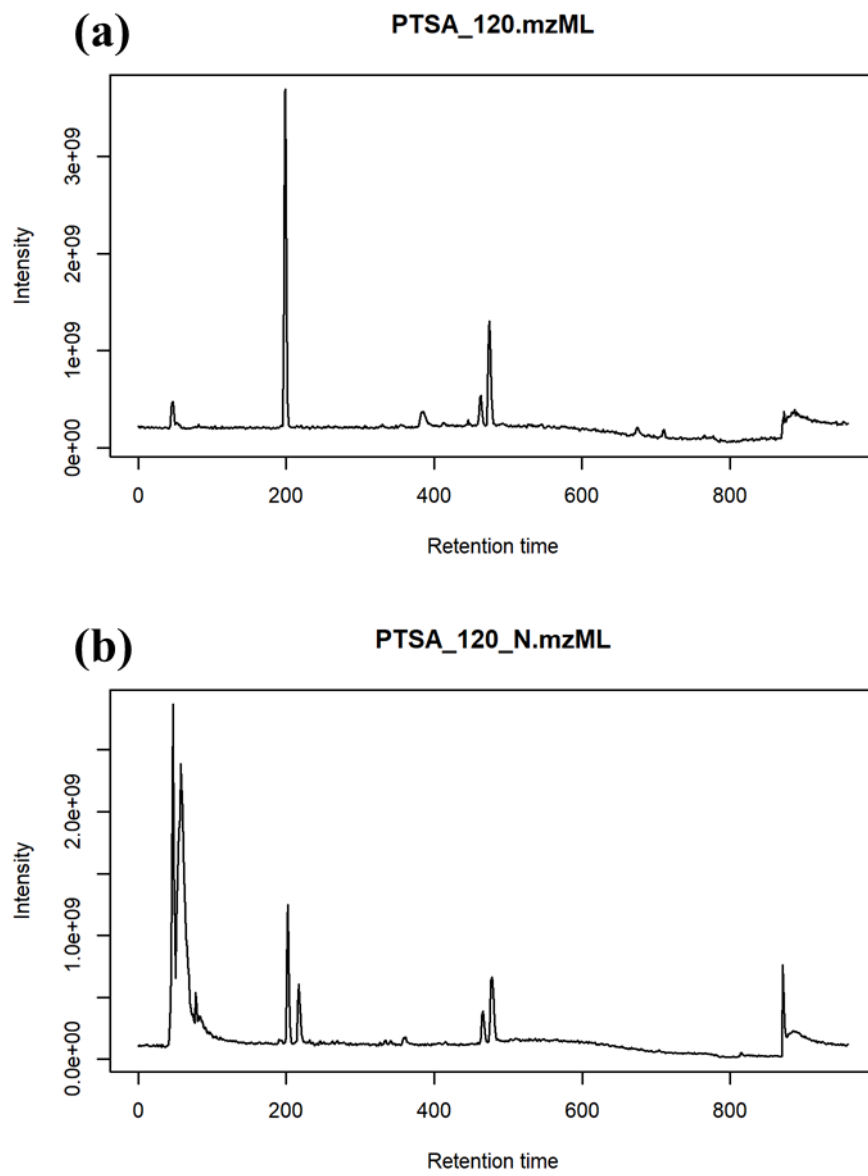

**Fig. S3.** The total ion chromatograms (TIC) for the PTSA effluent of FEEF system at 120 min (a) at positive mode, and (b) negative mode.

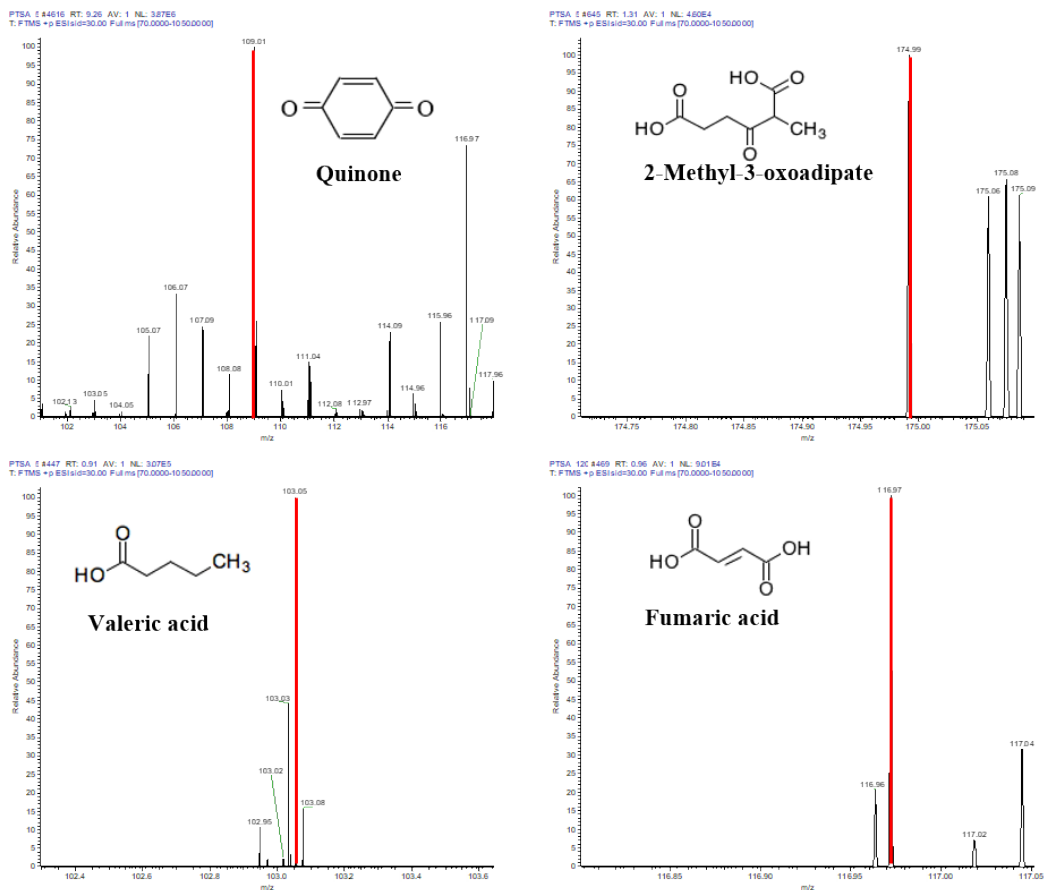

**Fig. S4.** LC-MS spectra for the PTSA intermediate products in the effluent of FEEF system at positive mode.

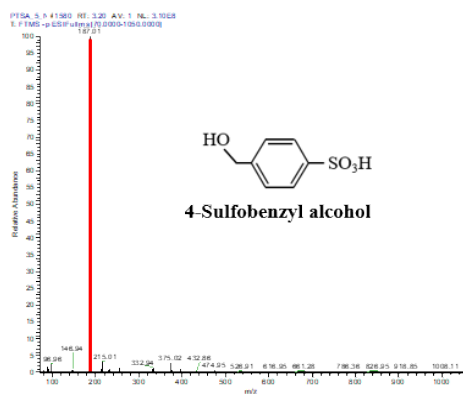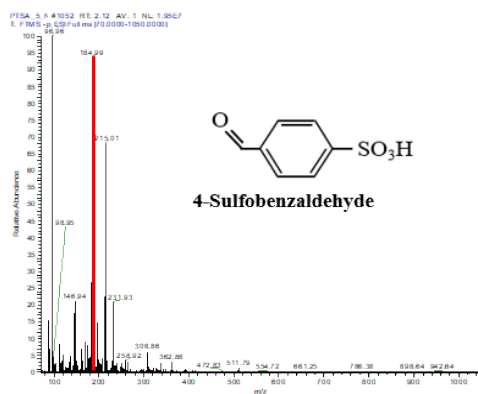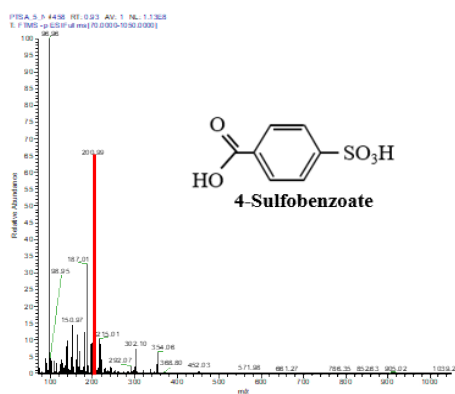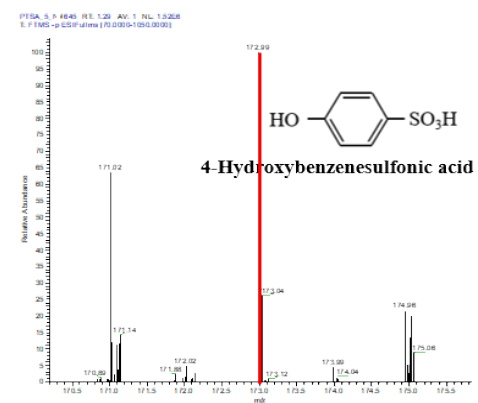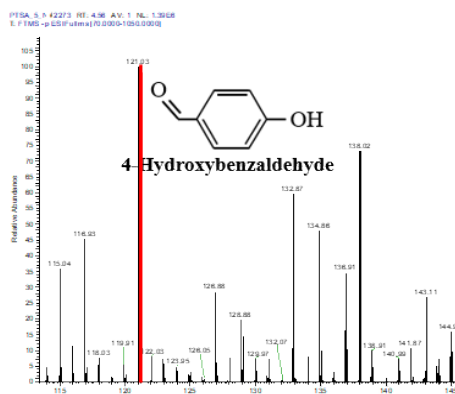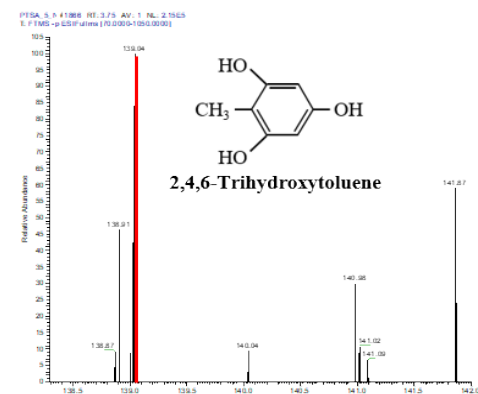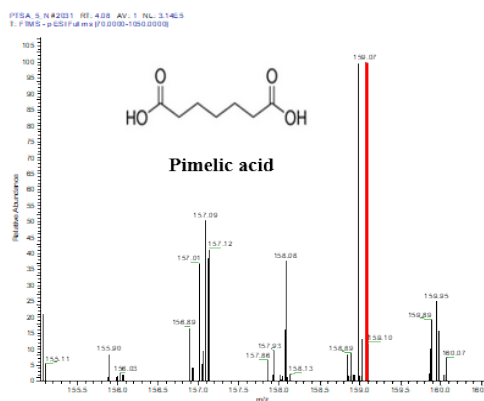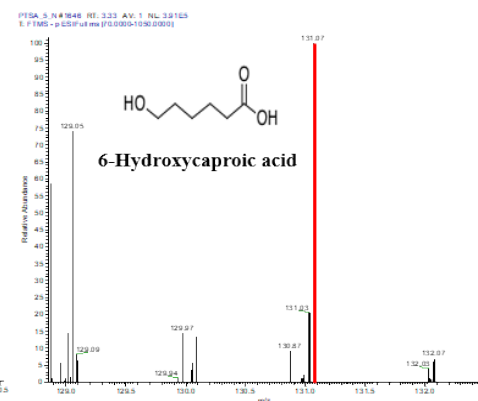

**Fig. S5.** LC-MS spectra for the PTSA intermediate products in the effluent of FEEF system at negative mode.

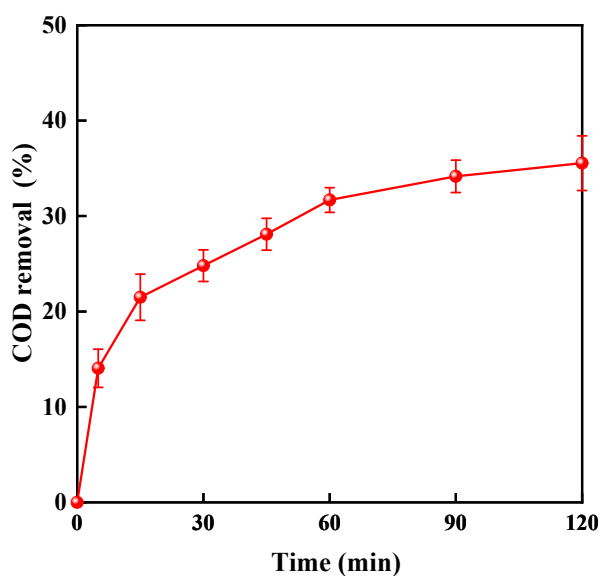

**Fig. S6.** The removal efficiency of COD in MCEF system under the experimental conditions of  $[PTSA]_0 = 100$  mg/L, voltage = 2.5 V, pH = 3.0, 0.2 mM  $Fe^{2+}$  and 1.0 mM  $H_2O_2$  dosage

**Table S1.** Treatment cost of pre-unit PTSA removal in three systems.

| Items<br>(\$/kg PTSA)              | FEEF                  | Fenton                | Anodic oxidation      |
|------------------------------------|-----------------------|-----------------------|-----------------------|
| DC power supply                    | $3.49 \times 10^{-1}$ | 0                     | 3.53                  |
| Aeration                           | $4.48 \times 10^{-4}$ | $1.05 \times 10^{-3}$ | $5.23 \times 10^{-3}$ |
| 98% $FeSO_4 \cdot 7H_2O$           | $6.06 \times 10^{-2}$ | $1.27 \times 10^{-1}$ | 0                     |
| 27.5% $H_2O_2$                     | $3.97 \times 10^{-1}$ | $8.32 \times 10^{-1}$ | 0                     |
| iron sludge treatment <sup>a</sup> | $5.72 \times 10^{-2}$ | $1.20 \times 10^{-1}$ | 0                     |
| Total Cost                         | $8.64 \times 10^{-1}$ | 1.08                  | 3.53                  |

<sup>a</sup> The price of iron sludge disposal is obtained from a solid waste disposal enterprise (Shanghai Environment Group Co., Ltd.) in China.

**Table S2** Comparison of PTSA removal efficiency with other system literature results.



| Process                                                         | Reaction conditions                                                                        | The initial<br>Concentration of<br>ammonia | Removal<br>efficiency       | Reference    |
|-----------------------------------------------------------------|--------------------------------------------------------------------------------------------|--------------------------------------------|-----------------------------|--------------|
| Catalytic ozonation<br>(Co <sub>x</sub> Fe <sub>1</sub> LDH)    | Catalyst dosage 0.1<br>g/L, aqueous ozone<br>concentration 6.2 mg/L                        | 20 mg/L PTSA                               | 85% PTSA<br>removal         | 1            |
| Combined zero-<br>valent iron (ZVI)-<br>photo-Fenton<br>process | Commercial steel wool,<br>H <sub>2</sub> O <sub>2</sub> 24 mg/L, UV 300<br>nm              | 5 mg/L PTSA                                | 60% PTSA<br>removal         | 2            |
| Photo-Fenton                                                    | Iron (III) chloride 20<br>mg/L,<br>H <sub>2</sub> O <sub>2</sub> 1.0 mM                    | 861 mg/L PTSA                              | 6 h, 47%<br>PTSA<br>removal | 3            |
| Filtration-enhanced<br>electro-Fenton                           | Applied voltage 2.5 V,<br>Fe <sup>2+</sup> 0.2 mM, H <sub>2</sub> O <sub>2</sub> 1.0<br>mM | 100 mg/L PTSA                              | 2 h, 98%<br>PTSA<br>removal | This<br>work |

## Reference

- 1 X. Fu, Y. Huang, Y. Wang, M. Liang, Y. Yang, Z. Jin, J. Yang, S. Hu and L. Li, Ozonation Catalyzed by Co<sub>x</sub>Fe<sub>1</sub> Layered Double Hydroxide for the Degradation of *P*-toluenesulfonic Acid, *Ozone Sci. Eng.*, 2021, **43**, 163–172.
- 2 L. Santos-Juanes, F. S. García Einschlag, A. M. Amat and A. Arques, Combining ZVI reduction with photo-Fenton process for the removal of persistent pollutants, *Chem. Eng. J.*, 2017, **310**, 484–490.
- 3 A. M. Amat, A. Arques, F. López and M. A. Miranda, Solar photo-catalysis to remove paper mill wastewater pollutants, *Sol. Energy*, 2005, **79**, 393–401.
